# Supplementary material for: Fishery nutrient profiles provide a practical tool for nutrition-sensitive fisheries management
Source: Research Square preprint supplement (doi:10.21203/rs.3.rs-5658106/v1), 2025-01-07
Supplement: Supplementary file 1 [file fb19af2c6e7dd99b81cd7905.docx]

Fishery nutrient profiles provide a practical tool for nutrition-sensitive fisheries management

**Lorenzo Longobardi, Gianna Bonis-Profumo, Hamza Altarturi, Jessica Bogard, Joctan Dos Reis Lopes, Jeppe Kolding, Villiam Sozinho, Alexander Tilley**

**Keywords**: small-scale fisheries; nutrition-sensitive; multispecies fisheries management; malnutrition; micronutrients; LMIC

Supplementary Information


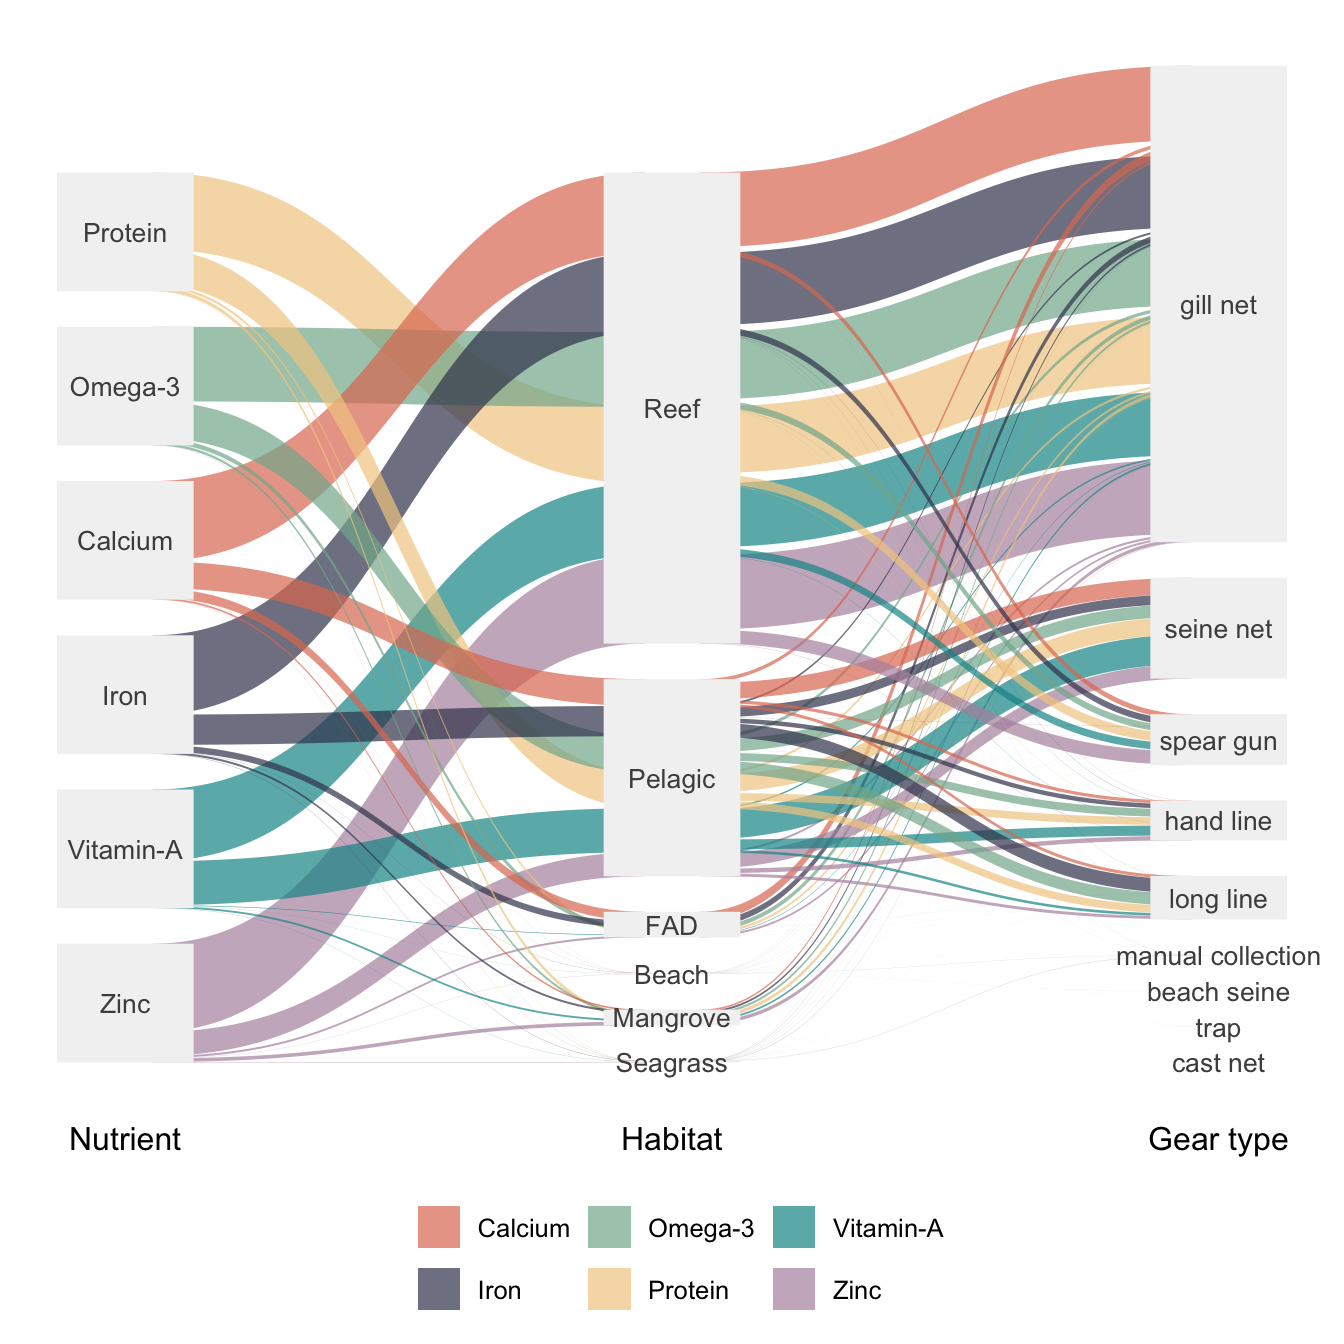


**Supplementary** **Fig. 1**. Sankey diagram showing the relative distribution of key nutrients across various marine habitats and the corresponding extraction by different fishing gear types used in Timor-Leste’s small-scale fisheries.

**Supplementary Table 1**. The proportion of Women of Reproductive Age in Timor-Leste (WRA) that would meet 20% of recommended nutrient intake (RNI) daily (%), and WRA that would meet RNI for 4 and 6 nutrients (number), from marine catches in Timor-Leste, nationally and by municipality.

| **Geography a** | **Protein (%)** | **Zn**  **(%)** | **Ca**  **(%)** | **Omega-3 (%)** | **Vit A**  **(%)** | **Fe**  **(%)** | **Number of WRA:**  **4 nutrients** | **Number of WRA:**  **6 nutrients** |
| --- | --- | --- | --- | --- | --- | --- | --- | --- |
| **National** | **114.8** | **57.0** | **33.3** | **28.8** | **22.6** | **12.0** | **97,219** | **40,548** |
| Ainaro | 2.2 | 1.0 | 0.6 | 0.8 | 0.4 | 0.2 | 100 | 30 |
| Atauro | 1,293.8 | 786.2 | 219.9 | 174.4 | 499.6 | 110.2 | 5,653 | 2,833 |
| Baucau | 66.1 | 34.8 | 39.2 | 20.5 | 6.3 | 12.3 | 6,341 | 1,947 |
| Bobonaro | 362.7 | 189.9 | 100.3 | 105.3 | 57.8 | 29.0 | 24,880 | 7,195 |
| Covalima | 51.5 | 26.8 | 26.6 | 13.3 | 7.2 | 9.3 | 2,353 | 1,275 |
| Dili | 8.4 | 4.2 | 1.9 | 1.5 | 2.3 | 0.8 | 1,806 | 740 |
| Lautem | 319.0 | 144.6 | 106.0 | 55.2 | 85.7 | 39.4 | 13,848 | 6,356 |
| Liquiça | 157.8 | 77.4 | 52.3 | 43.6 | 16.8 | 20.2 | 9,011 | 3,467 |
| Manatuto | 623.7 | 310.8 | 207.7 | 232.6 | 64.6 | 72.0 | 24,617 | 7,660 |
| Manufahi | 23.9 | 11.9 | 10.2 | 8.2 | 3.3 | 3.0 | 1,153 | 425 |
| Oecusse | 214.1 | 101.1 | 33.2 | 32.9 | 53.8 | 17.6 | 6,387 | 3,394 |
| Viqueque | 114.8 | 42.8 | 14.8 | 18.5 | 42.9 | 7.9 | 3,344 | 1,431 |

Notes: Calculations are based on estimated marine catches per municipality and 2022 census data on women of reproductive age (15-49 years).

Marine catches: averaged 2020-2022 annual value in kg. These values represent municipal-level estimates based on the number of fishing boats recorded in the 2021 Timor-Leste boat census, average number of fishing trips per boat and average landing weight values for each fish group.

a Municipalities with coastal areas are included (Aileu, Ermera excluded).

**Supplementary Table 2**. Women of Reproductive Age that would meet the recommended quantity of edible fish annually based on Food Based Dietary Guidelines recommendations, from marine catches in Timor-Leste, nationally and by municipality.

| **Geography a** | **Annual marine catches (Mt) b**  **(average 2020-22)** | **Number of WRA c** | **WRA that would meet FBDG recommendations d** | |
| --- | --- | --- | --- | --- |
| **Percentage** | **Number** |
| **National** | **6,688** | **337,144** | **72.5** | **244,300** |
| Ainaro | 21 | 16,925 | 4.5 | 769 |
| Atauro | 751 | 2,570 | 1067.9 | 27,445 |
| Baucau | 313 | 31,006 | 36.9 | 11,450 |
| Bobonaro | 1,460 | 24,798 | 215.1 | 53,349 |
| Covalima | 149 | 17,643 | 30.9 | 5,452 |
| Dili | 161 | 97,447 | 6.0 | 5,889 |
| Lautem | 950 | 16,151 | 214.9 | 34,715 |
| Liquiça | 612 | 20,657 | 108.3 | 22,370 |
| Manatuto | 1,281 | 11,852 | 395.0 | 46,811 |
| Manufahi | 57 | 14,030 | 14.8 | 2,080 |
| Oecusse | 491 | 19,250 | 93.3 | 17,954 |
| Viqueque | 438 | 18,094 | 88.5 | 16,016 |

b Marine catches: averaged 2020-2022 annual value in Metric tons. These values represent municipal-level estimates based on the number of fishing boats recorded in the 2021 Timor-Leste boat census, average number of fishing trips per boat and average landing weight values for each fish group.

c Timor-Leste Population Census 2022, women 15-49 years.

d Food-Based Dietary Guidelines (FBDG) recommend consuming 100 g of cooked fish two-three times a week for adults50, 250 g cooked equivalent to 45 g/day of raw fish and 16.4 kg/year. The fish quantities recommended by the FBDG are for edible flesh, not whole fish. An edible coefficient of 0.6 has been applied to fish catches contributions, average of edible flesh for Sardinellas, Indian Mackerels, Scads, and Frigate and bullet tunas88.


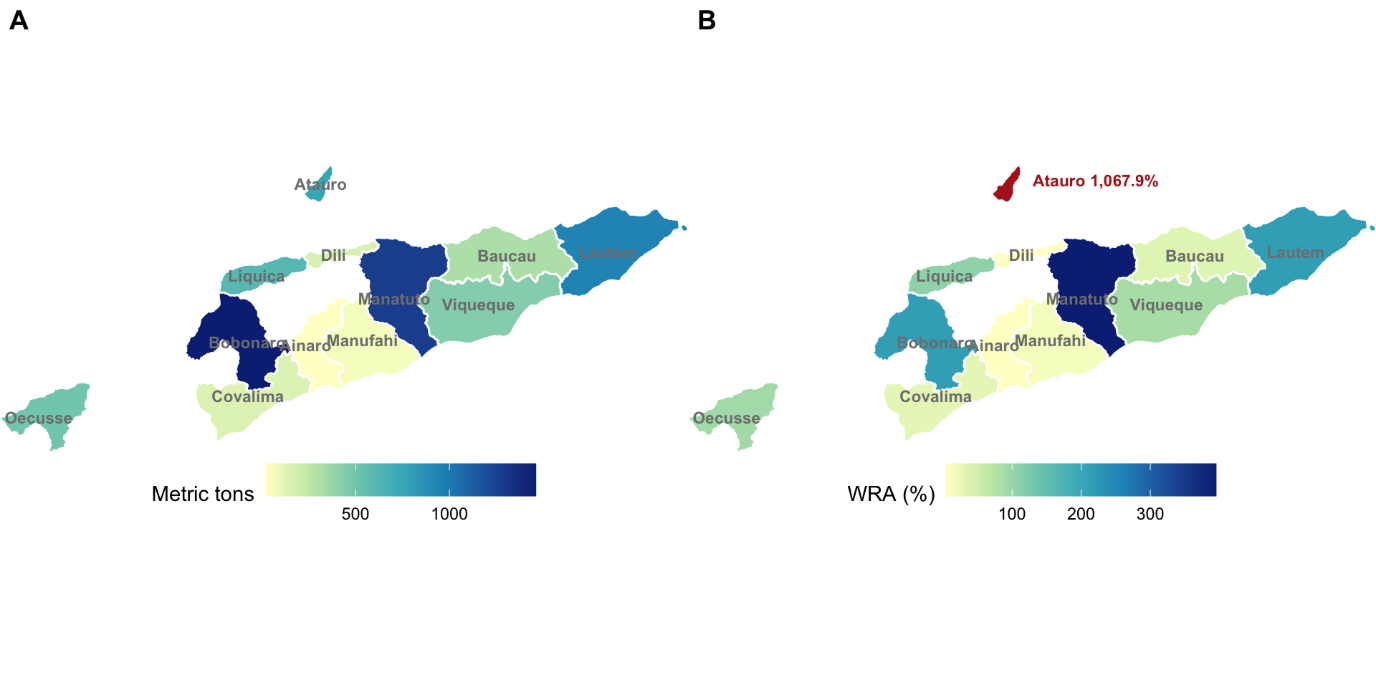


**Supplementary Fig. 2**. Timor-Leste small-scale fisheries production (**A**) and contributions to dietary fish recommendations (**B**). Annual marine small-scale fisheries catches by municipality (2020–2022 average) are shown in Metric tons (Mt), with a total national production of 6,688 Mt (**Panel A**). The percentage of Women of Reproductive Age (WRA) meeting the recommended annual edible fish intake based on current catches is illustrated, showing that 72.5% of WRA in Timor-Leste could meet guidelines (**Panel B**). Four municipalities (Atauro, Bobonaro, Lautem, Manatuto) produce surplus catches, indicating potential for trade and redistribution to other municipalities with deficits. Atauro is highlighted in red due to its out scaled catch relative to other municipalities.


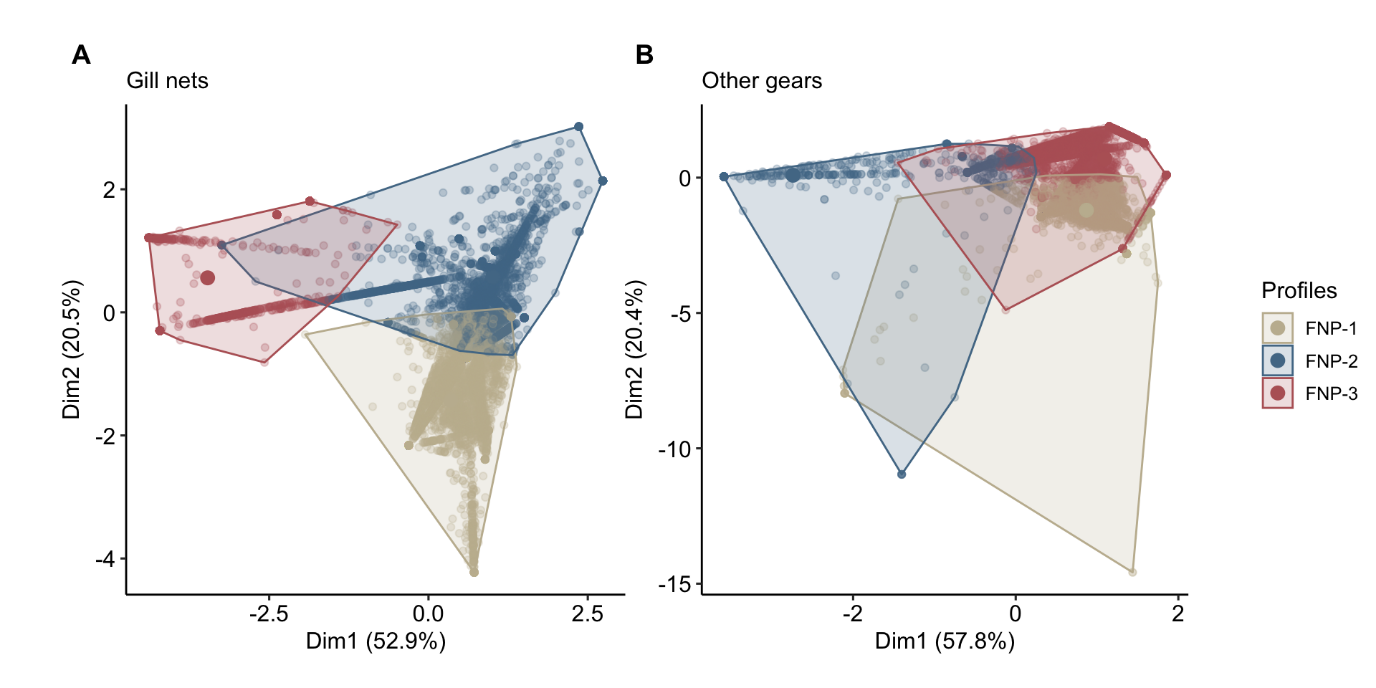


**Supplementary Fig. 3**. Fishery Nutrient Profile clustering of fishing trips gear type. Each plot presents a k-means clustering analysis of fishing trip observations, grouped by their nutritional contributions to the recommended nutrient intake (RNI) for six nutrients. The panels display data subsets for gill nets (**A**) and all other gear types (**B**), specifically. The scatter plots within each panel are charted in a two-dimensional space defined by the first two principal components, with the axes denoting the percentage of explained variance. Points are color-coded to denote distinct Fishery Nutrient Profile clusters derived from the k-means algorithm. Convex hulls define the periphery of each cluster, providing insight into the cluster density and separation. Convex hulls around the clusters aid in visualizing the distribution and delineation of Fishery Nutrient Profile groupings across different fishing methods.

**Supplementary Table 3**. Results of PERMANOVA analysis evaluating the homogeneity of Fishery Nutrient Profiles within clusters of fishing trips, categorized by gear type (gill net, other gears). The analysis details include degrees of freedom (df), sum of squares, R-squared values (R²), PERMANOVA statistics, and p-values for each cluster and residual variance. The R² values indicate the proportion of variance explained by the clusters.

| **Data subset** | **Term** | **df** | **Sum of squares** | **R2** | **Statistic** | **p-value** |
| --- | --- | --- | --- | --- | --- | --- |
| Gill net | Clusters | 4 | 14899.02 | 0.81 | 10879.56 | < 0.001 |
| Residual | 10166 | 3480.46 | 0.19 |  |  |
| Total | 10170 | 18379.48 | 1 |  |  |
| Other gears | Clusters | 4 | 10871.14 | 0.85 | 7753.61 | < 0.001 |
| Residual | 5477 | 1919.79 | 0.15 |  |  |
| Total | 5481 | 12790.93 | 1 |  |  |

**Supplementary Table 4.** Performance Metrics for XGBoost Model Across Fishing Data Subsets. This table provides the predictive performance metrics of an XGBoost classification model for two distinct subsets of fishing gill nets and other gear data. The metrics collectively reflect the model’s ability to discriminate between Fishery Nutrient Profiles, its overall accuracy, and the balance between the sensitivity and specificity for each subset.

| **Metric** | **Description** | **Gill nets** | **Other gears** |
| --- | --- | --- | --- |
| ROC AUC Score | Measures overall model performance, with 1 being perfect | 0.92 | 0.91 |
| Accuracy | Proportion of correct predictions | 0.76 | 0.8 |
| Kappa Statistic | Agreement between predicted and actual values beyond chance | 0.62 | 0.7 |
| Recall | Ability to correctly identify positive cases (true positives) | 0.77 | 0.81 |
| Specificity | Ability to correctly identify negative cases (true negatives) | 0.88 | 0.9 |
| Precision | Likelihood that positive prediction is correct | 0.74 | 0.8 |
| Negative Predictive Value | Likelihood that negative prediction is correct | 0.87 | 0.9 |
| Youden's J Index | Sum of sensitivity and specificity minus 1, indicating effectiveness | 0.65 | 0.71 |
| Balanced Accuracy | Average of sensitivity and specificity | 0.82 | 0.86 |
| Detection Prevalence | Proportion of cases predicted as positive | 0.33 | 0.33 |
| F-measure | Harmonic mean of Precision and Recall | 0.75 | 0.8 |


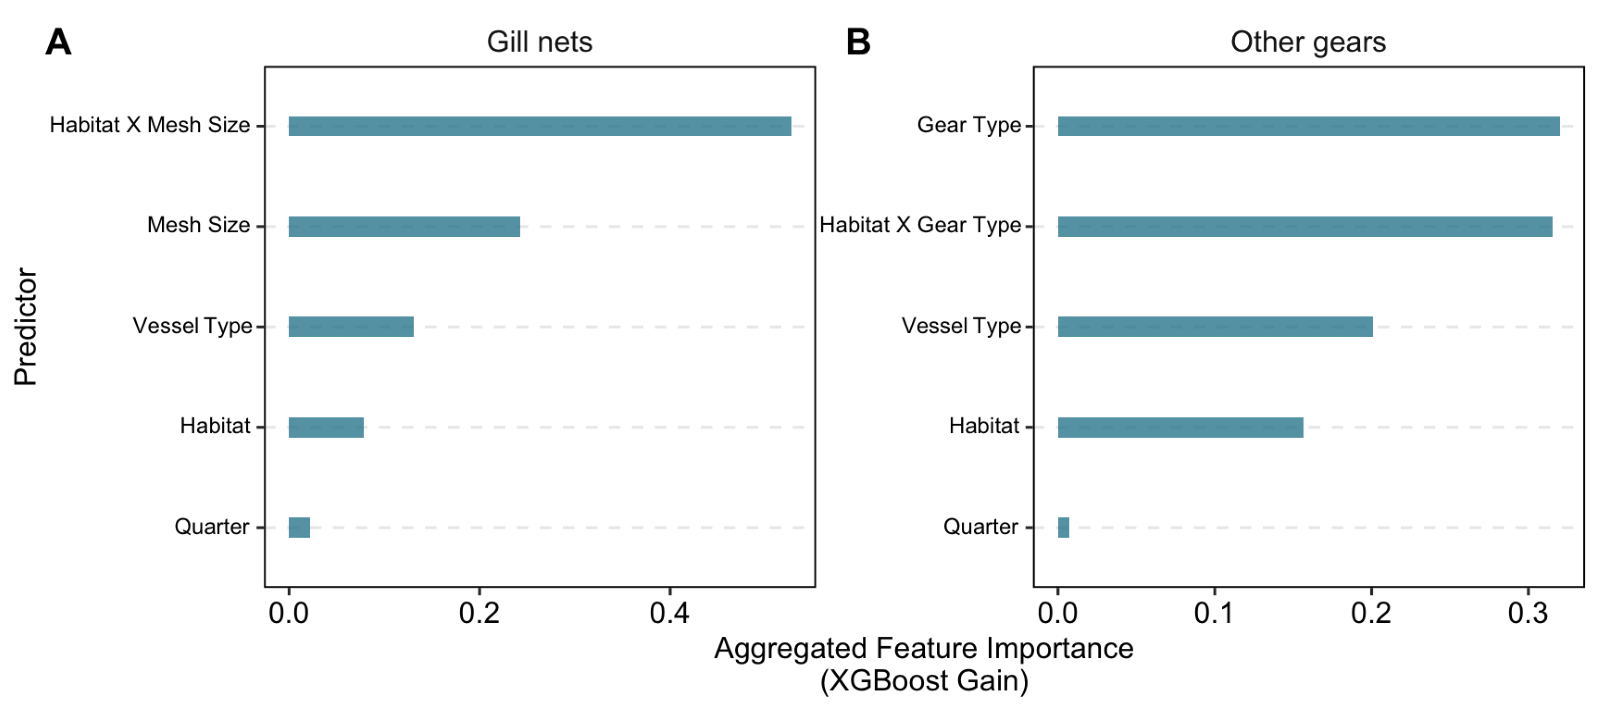
**Supplementary Fig. 4**: Aggregated feature importance (XGBoost gain) for predicting nutritional outcomes across fishing gears. **Panel A** presents feature importance for gill nets, with predictors including habitat, mesh size, vessel type, and the interaction between habitat and mesh size. **Panel B** shows feature importance for all other gear types, with predictors including gear type, habitat, vessel type, and the interaction between habitat and gear type. The x-axis denotes the aggregated gain, with higher values indicating greater predictor influence on model accuracy.
